# Supplementary material for: Non-contact fluorescent bleaching-independent method for temperature measurement in microfluidic systems based on DNA melting curves
Source: Royal Society of Chemistry journal article supplement (doi:10.1039/c005243d), 2010-01-01

### Supplemental data: Preparation of DNA samples

The DNA samples were prepared using PCR conducted with a Light Cycler (Roche Diagnostics). The vector pGEX-4T3 plasmid (GE Healthcare) was used as the DNA template. The primers are listed as the follows:

TK4E-69-FW (5'-tac ggt gtt tcg aga att gc-3')  
TK4E-69-RV (5'-cat gaa gtc agg atg ggt tac a-3')  
and  
TK4E-83-FW (5'-ata gca tgg cct ttg cag-3')  
TK4E-83-RV (5'-cgc tac gtg act ggg tca t-3')

The real-time PCR followed the protocol recommended in the LightCycler® DNA Master SYBR Green I (Roche) documents. The detailed parameters are listed in Tables 1 & 2

Table 1: Reagents for real-time PCR

| Reagents                           | Volume ( $\mu\text{L}$ ) |
|------------------------------------|--------------------------|
| Light Cycler FastSmart DNA Master  | 7.5                      |
| Forward primer (10 $\mu\text{M}$ ) | 0.75                     |
| Reverse primer (10 $\mu\text{M}$ ) | 0.75                     |
| H <sub>2</sub> O                   | 6.0                      |
| DNA template                       | 5.0                      |
| Total volume                       | 20.0                     |

Table 2: Parameters for real-time PCR

| Cycle No | Cycle step   | Temperature ( $^{\circ}\text{C}$ ) | Duration |
|----------|--------------|------------------------------------|----------|
| 30–40    | Precondition | 95                                 | 10 min   |
|          | Denaturation | 95                                 | 10 s     |
|          | Annealing    | 60                                 | 30 s     |
|          | Extension    | 72                                 | 15 s     |

The first pair yielded a DNA with a  $T_m$  of 78  $^{\circ}\text{C}$  and 89  $^{\circ}\text{C}$  for the latter, as measured by the LightCycler at a scanning rate of 0.10  $^{\circ}\text{C}/\text{s}$  as a benchmark. (see Fig. S1 below):

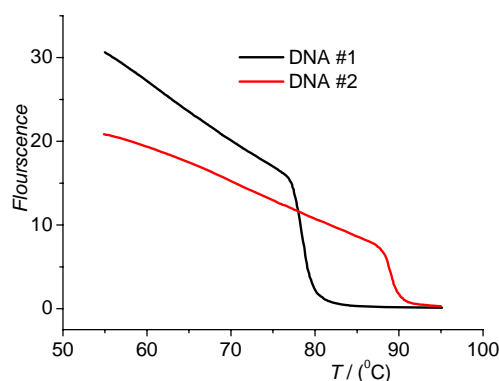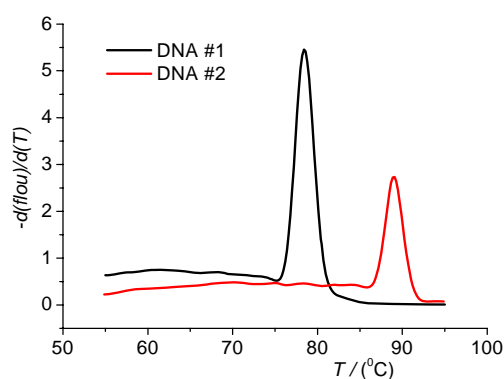

Supplement: c005243d.pdf [file c005243d.pdf]
